# Supplementary material
Source: Springer Nature journal article supplement (https://www.springermedizin.de/resource/supplementary/12967_2010_688_MOESM4_ESM.pdf/9577200)

**A****Control****3BrP****IA****5-FU****G cells**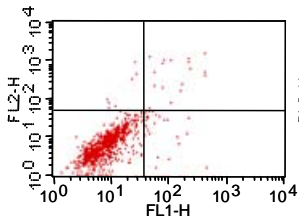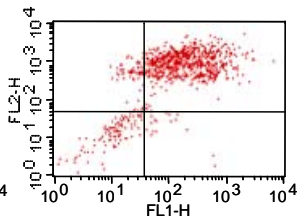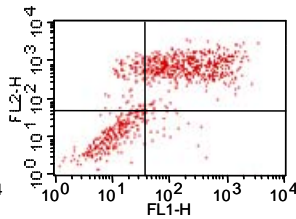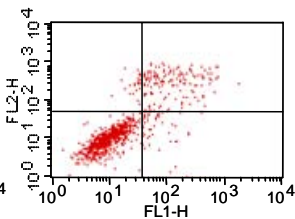**M cells**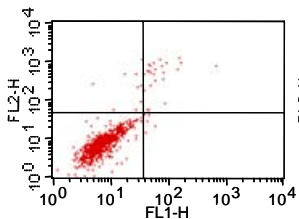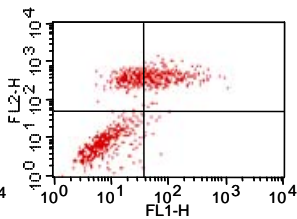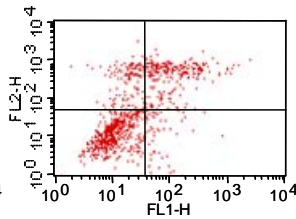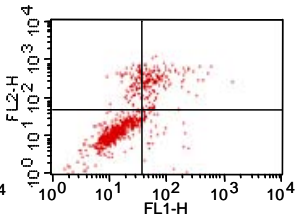**SM cells**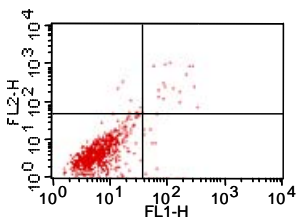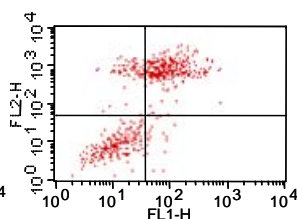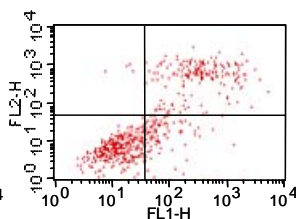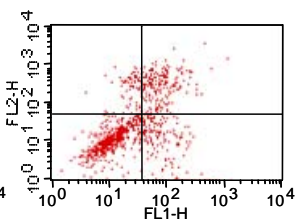**B**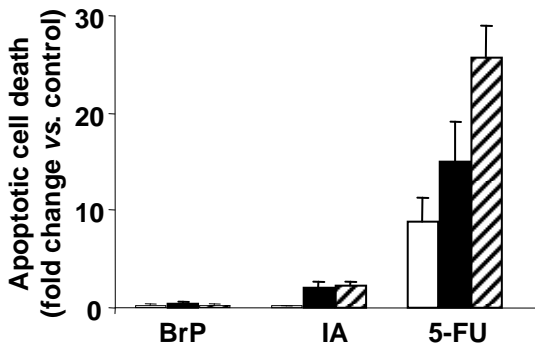**C**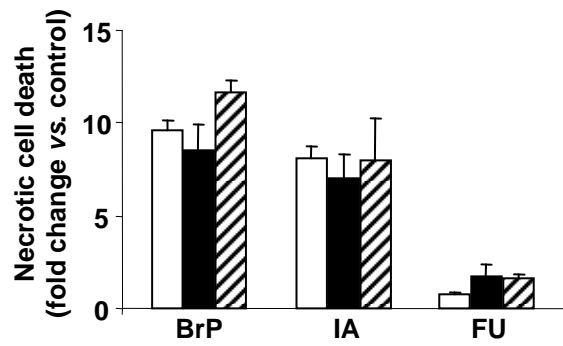

Supplement: MOESM4 [file 9577200]
